# Supplementary material for: A multiaxial electrical switching in a one-dimensional organic–inorganic (pyrrolidinium)2Cd2I6ferroelectric and photoluminescent crystal
Source: Royal Society of Chemistry journal article supplement (doi:10.1039/d1tc01526e), 2021-01-01
Supplement: d1tc01526e1.pdf [file d1tc01526e1.pdf]

Supplementary Materials

**A multiaxial electrical switching of a one-dimensional organic-inorganic  
(pyrrolidinium)<sub>2</sub>Cd<sub>2</sub>I<sub>6</sub>-ferroelectric photoluminescent**

**Magdalena Rok<sup>a</sup>, Bartosz Zarychta<sup>b</sup>, Andrzej Bil<sup>a</sup>, Joanna Trojan-Piegza<sup>a</sup>, Wojciech Medycki<sup>c</sup>, Andrzej Miniewicz<sup>d</sup>, Anna Piecha-Bisiorek<sup>a</sup>, Agnieszka Ciżman<sup>e</sup>, Ryszard Jakubas<sup>a</sup>**

<sup>a</sup>Faculty of Chemistry, University of Wrocław, 14 F. Joliot – Curie, 50-383 Wrocław, Poland

<sup>b</sup>Faculty of Chemistry, University of Opole, Opole PL-45052, Poland

<sup>c</sup>Institute of Molecular Physics, Polish Academy of Sciences, Smoluchowskiego 17, 60-179 Poznań, Poland

<sup>d</sup>Advanced Materials Engineering and Modelling Group, Faculty of Chemistry, Wrocław University of Science and Technology, Wybrzeże Wyspiańskiego 27, 50-370 Wrocław, Poland

<sup>e</sup>Department of Experimental Physics, Wrocław University of Science and Technology, Wybrzeże Wyspiańskiego 27, 50-370 Wrocław, Poland

**CAPTIONS OF FIGURES**

|                                                                                                                                                                                                             |    |
|-------------------------------------------------------------------------------------------------------------------------------------------------------------------------------------------------------------|----|
| <b>Fig. S1.</b> X-ray diffraction pattern at 298 K of <b>PCdl</b> (blue) and calculated from crystal structure (red)...                                                                                     | 2  |
| <b>Fig. S2.</b> The results of the simultaneous TGA/DSC analyses for <b>PCdl</b> (sample mass $m = 13.7640$ mg, 5K/min.....                                                                                 | 3  |
| <b>Fig. S3.</b> The melting point measurement of the <b>PCdl</b> powder under optical microscope, insert: the photographs of the crystal in two phases, solid I and liquid measured on the heating run..... | 3  |
| <b>Fig. S4.</b> Packing diagram of ( <b>PCdl</b> ), (a) at 100 K and (b) at 300 K projected at (011) plane .....                                                                                            | 8  |
| <b>Fig. S5.</b> Gaussian deconvolution of photoluminescence spectrum of <b>PCdl</b> measured at 11 K.....                                                                                                   | 11 |
| <b>Fig. S6.</b> Temperature dependence of excitation spectra monitored at 535 nm.....                                                                                                                       | 11 |
| <b>Fig. S7.</b> Temperature dependence of 535 nm emission decay. ....                                                                                                                                       | 12 |
| <b>Fig. S8.</b> Temperature dependence of the integrated emission intensity (brown spheres) and FWHM (blue spheres) of <b>PCdl</b> . ....                                                                   | 13 |
| <b>Fig. S9.</b> Temperature dependence of the second moment, $M_2$ , of the proton NMR lines for <b>PCdl</b> .....                                                                                          | 15 |

**CAPTIONS OF TABLES**

|                                                                                                                                                                                                                                                                                                                                                                                                                                                                                                                                                                                        |    |
|----------------------------------------------------------------------------------------------------------------------------------------------------------------------------------------------------------------------------------------------------------------------------------------------------------------------------------------------------------------------------------------------------------------------------------------------------------------------------------------------------------------------------------------------------------------------------------------|----|
| <b>Table S1.</b> Experimental details. For all structures: $C_8H_{20}Cd_2I_6N_2$ ( <b>PCdl</b> ), $M_r = 1130.46$ , monoclinic, $Cc$ , $Z = 4$ . Experiments were carried out at 100.0 K with Mo $K\alpha$ radiation. Absorption was corrected for by multi-scan methods, CrysAlis RED, Oxford Diffraction Ltd., Version 1.171.33.57 (release 26-01-2010 CrysAlis171 .NET) (compiled Jan 26 2010,14:36:55) Empirical absorption correction using spherical harmonics, implemented in SCALE3 ABSPACK scaling algorithm.. H-atom parameters were constrained.....                        | 4  |
| <b>Table S2.</b> Geometric parameters ( $\text{\AA}$ , $^\circ$ ) .....                                                                                                                                                                                                                                                                                                                                                                                                                                                                                                                | 5  |
| <b>Table S3.</b> Hydrogen-bond parameters.....                                                                                                                                                                                                                                                                                                                                                                                                                                                                                                                                         | 7  |
| <b>Table S4.</b> Spontaneous polarization [ $\mu\text{C}\cdot\text{cm}^{-2}$ ] for LT phase and ordered models of HT phase calculated within Berry phase approach using LDA functional. For the polar axes of the LT phase, a polarization indetermination quantum is a multiple of $7.883 \mu\text{C}\cdot\text{cm}^{-2}$ along the a axis and $11.608 \mu\text{C}\cdot\text{cm}^{-2}$ along the c axis. The respective values for HT phase are $7.716 \mu\text{C}\cdot\text{cm}^{-2}$ and $11.169 \mu\text{C}\cdot\text{cm}^{-2}$ .<br>..... <b>Błąd! Nie zdefiniowano zakładki.</b> |    |
| <b>Table S5.</b> Spontaneous polarization [ $\mu\text{C}\cdot\text{cm}^{-2}$ ] for LT phase and ordered models of HT phase calculated within Berry phase approach using PBA functional..... <b>Błąd! Nie zdefiniowano zakładki.</b>                                                                                                                                                                                                                                                                                                                                                    |    |
| <b>Table S6.</b> Temperature dependence of average lifetime of 535 nm emission. The decay curves recorded during 335 nm excitation.....                                                                                                                                                                                                                                                                                                                                                                                                                                                | 12 |
| <b>Table S7.</b> Comparison of the CIE chromaticity coordinates (x, y) and CCT (K) for <b>PCdl</b> .....                                                                                                                                                                                                                                                                                                                                                                                                                                                                               | 13 |

**Table S8.** Activation energies, correlation times and motional constants evaluated for **PCdl**. ..... 15

**Spontaneous polarization – theoretical calculations.** ..... 9

**<sup>1</sup>H-NMR.** ..... 14

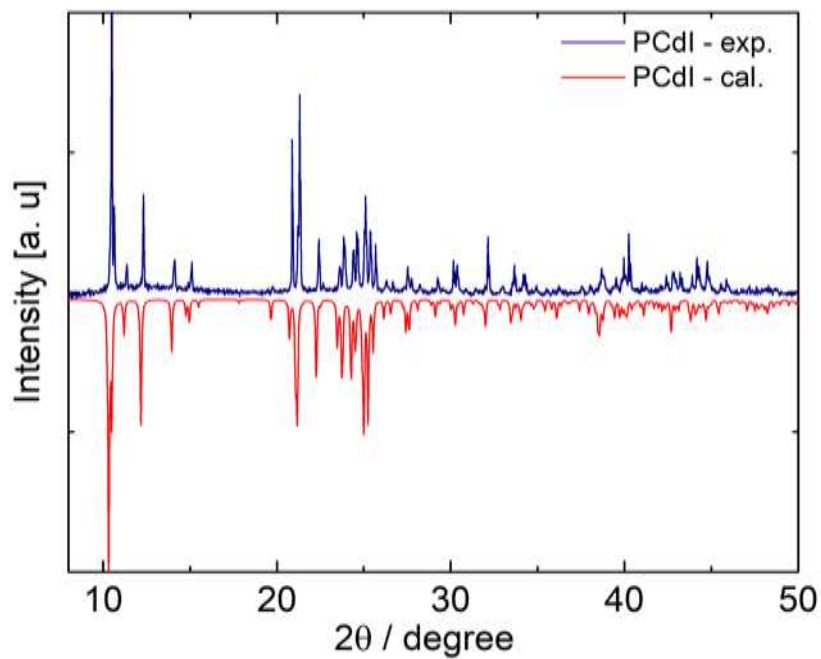

**Fig. S1.** X-ray diffraction pattern at 298 K of **PCdl** (blue) and calculated from crystal structure (red).

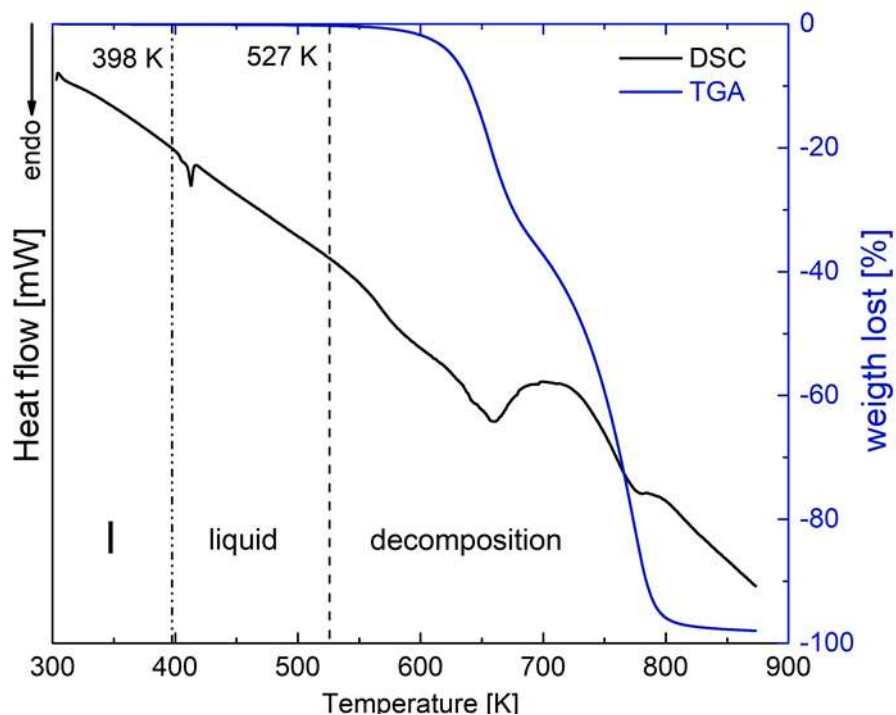

**Fig. S2.** The results of the simultaneous TGA/DSC analyses for **PCdl** (sample mass  $m = 13.7640$  mg, 5K/min).

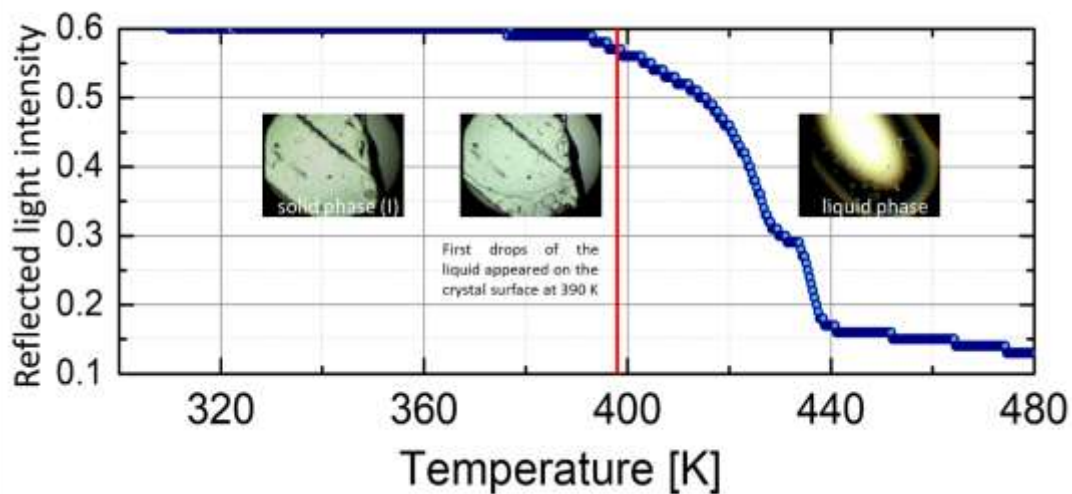

**Fig. S3.** The melting point measurement of the **PCdl** powder under optical microscope, insert: the photographs of the crystal in two phases, solid I and liquid measured on the heating run.

**Table S1.** Experimental details. For all structures:  $C_8H_{20}Cd_2I_6N_2$  (**PCdl**),  $M_r = 1130.46$ , monoclinic,  $Cc$ ,  $Z = 4$ . Experiments were carried out at 100.0 K with Mo  $K\alpha$  radiation. Absorption was corrected for by multi-scan methods, CrysAlis RED, Oxford Diffraction Ltd., Version 1.171.33.57 (release 26-01-2010 CrysAlis171 .NET) (compiled Jan 26 2010,14:36:55) Empirical absorption correction using spherical harmonics, implemented in SCALE3 ABSPACK scaling algorithm.. H-atom parameters were constrained.

|                                                                            | (100K)-II phase                                                                      | (300K)-I phase                                                                                                      |
|----------------------------------------------------------------------------|--------------------------------------------------------------------------------------|---------------------------------------------------------------------------------------------------------------------|
| <b>Crystal data</b>                                                        |                                                                                      |                                                                                                                     |
| $a, b, c$ (Å)                                                              | 11.6862 (3), 11.7895 (4), 17.2048 (5)                                                | 11.9639 (5), 11.9900 (5), 17.3189 (7)                                                                               |
| $\beta$ (°)                                                                | 93.918 (3)                                                                           | 98.442 (4)                                                                                                          |
| $V$ (Å <sup>3</sup> ), $Z$                                                 | 2364.84 (12)                                                                         | 2457.43 (18)                                                                                                        |
| $\mu$ (mm <sup>-1</sup> )                                                  | 9.62                                                                                 | 9.26                                                                                                                |
| Crystal size (mm)                                                          | 0.56 × 0.40 × 0.27                                                                   | 0.56 × 0.40 × 0.27                                                                                                  |
| <b>Data collection</b>                                                     |                                                                                      |                                                                                                                     |
| Diffractionmeter                                                           | Oxford Diffraction Xcalibur Sapphire 2 System                                        |                                                                                                                     |
| $T_{min}, T_{max}$                                                         | 0.430, 1.000                                                                         | 0.406, 1.000                                                                                                        |
| No. of measured, independent and observed [ $I > 2\sigma(I)$ ] reflections | 12855, 5449, 5421                                                                    | 14809, 5786, 4498                                                                                                   |
| $R_{int}$                                                                  | 0.057                                                                                | 0.060                                                                                                               |
| $(\sin \theta/\lambda)_{max}$ (Å <sup>-1</sup> )                           | 0.660                                                                                | 0.660                                                                                                               |
| <b>Refinement</b>                                                          |                                                                                      |                                                                                                                     |
| $R[F^2 > 2\sigma(F^2)], wR(F^2), S$                                        | 0.036, 0.091, 1.07                                                                   | 0.043, 0.118, 0.99                                                                                                  |
| No. of reflections                                                         | 5449                                                                                 | 5786                                                                                                                |
| No. of parameters                                                          | 163                                                                                  | 236                                                                                                                 |
| No. of restraints                                                          | 2                                                                                    | 270                                                                                                                 |
|                                                                            | $w = 1/[\sigma^2(F_o^2) + (0.0603P)^2 + 23.3407P]$<br>where $P = (F_o^2 + 2F_c^2)/3$ | $w = 1/[\sigma^2(F_o^2) + (0.0724P)^2]$<br>where $P = (F_o^2 + 2F_c^2)/3$                                           |
| $\Delta\rho_{max}, \Delta\rho_{min}$ (e Å <sup>-3</sup> )                  | 1.62, -1.32                                                                          | 1.05, -0.96                                                                                                         |
| Absolute structure                                                         | Classical Flack method preferred over Parsons because s.u. lower.                    | Flack $x$ determined using 1901 quotients [(I+)-(I-)]/[(I+)+(I-)] (Parsons and Flack (2004), Acta Cryst. A60, s61). |
| Absolute structure parameter                                               | 0.15 (6)                                                                             | 0.08 (7)                                                                                                            |

Computer programs: *CrysAlis CCD* (Oxford Diffraction, 2008), *CrysAlis RED* (Oxford Diffraction, 2008), *SHELXS2013* (Sheldrick, 2015), *SHELXL2013* (Sheldrick, 2015), *SHELXTL* (Sheldrick, 2015). *CrysAlis CCD and CrysAlis RED* 2008, Oxford Diffraction: Oxford Diffraction Ltd, Abingdon, England; Sheldrick GM (2015) Acta Cryst. A71, 3–8.

**Table S2.** Geometric parameters (Å, °)

| 100 K                    |             | 300 K                    |             |
|--------------------------|-------------|--------------------------|-------------|
| <b>Bond lengths</b>      |             |                          |             |
| Cd1—I3                   | 2.7372 (11) | Cd1—I3                   | 2.7168 (18) |
| Cd1—I2                   | 2.7384 (11) | Cd1—I2                   | 2.7198 (17) |
| Cd1—I1                   | 2.8391 (11) | Cd1—I1                   | 2.8474 (15) |
| Cd1—I4                   | 2.8393 (11) | Cd1—I4                   | 2.8504 (14) |
| Cd2—I5                   | 2.7161 (12) | Cd2—I6                   | 2.7195 (16) |
| Cd2—I6                   | 2.7373 (11) | Cd2—I5                   | 2.7261 (19) |
| Cd2—I4                   | 2.8122 (11) | Cd2—I4                   | 2.8337 (15) |
| Cd2—I1 <sup>i</sup>      | 2.8747 (11) | Cd2—I1 <sup>i</sup>      | 2.8502 (15) |
| I1—Cd2 <sup>ii</sup>     | 2.8747 (11) | I1—Cd2 <sup>ii</sup>     | 2.8502 (15) |
| N1—C5                    | 1.503 (16)  | N1—C2A                   | 1.16 (9)    |
| N1—C2                    | 1.504 (18)  | N1—C5B                   | 1.48 (10)   |
| C2—C3                    | 1.51 (2)    | N1—C5A                   | 1.52 (11)   |
| C3—C4                    | 1.51 (2)    | N1—C2B                   | 1.67 (7)    |
| C4—C5                    | 1.49 (2)    | C2A—C3A                  | 1.38 (9)    |
| N6—C7                    | 1.526 (16)  | C3A—C4A                  | 1.58 (11)   |
| N6—C10                   | 1.527 (15)  | C4A—C5A                  | 1.62 (14)   |
| C7—C8                    | 1.525 (19)  | C2B—C3B                  | 1.55 (11)   |
| C8—C9                    | 1.52 (2)    | C3B—C4B                  | 1.48 (9)    |
| C9—C10                   | 1.495 (18)  | C4B—C5B                  | 1.34 (13)   |
|                          |             | N6—C7B                   | 1.33 (6)    |
|                          |             | N6—C10A                  | 1.34 (6)    |
|                          |             | N6—C7A                   | 1.52 (6)    |
|                          |             | N6—C10B                  | 1.64 (5)    |
|                          |             | C7A—C8A                  | 1.60 (7)    |
|                          |             | C8A—C9A                  | 1.49 (7)    |
|                          |             | C9A—C10A                 | 1.48 (6)    |
|                          |             | C7B—C8B                  | 1.46 (6)    |
|                          |             | C8B—C9B                  | 1.51 (7)    |
|                          |             | C9B—C10B                 | 1.67 (7)    |
| <b>Valance angles</b>    |             |                          |             |
| I3—Cd1—I2                | 120.73 (4)  | I3—Cd1—I2                | 121.21 (6)  |
| I3—Cd1—I1                | 114.76 (4)  | I3—Cd1—I1                | 111.37 (6)  |
| I2—Cd1—I1                | 106.57 (4)  | I2—Cd1—I1                | 107.68 (6)  |
| I3—Cd1—I4                | 104.23 (4)  | I3—Cd1—I4                | 107.67 (6)  |
| I2—Cd1—I4                | 112.29 (4)  | I2—Cd1—I4                | 109.42 (6)  |
| I1—Cd1—I4                | 95.39 (3)   | I1—Cd1—I4                | 96.72 (4)   |
| I5—Cd2—I6                | 119.46 (4)  | I6—Cd2—I5                | 118.60 (7)  |
| I5—Cd2—I4                | 114.49 (4)  | I6—Cd2—I4                | 107.87 (5)  |
| I6—Cd2—I4                | 108.89 (4)  | I5—Cd2—I4                | 113.89 (6)  |
| I5—Cd2—I1 <sup>i</sup>   | 105.61 (4)  | I6—Cd2—I1 <sup>i</sup>   | 110.62 (6)  |
| I6—Cd2—I1 <sup>i</sup>   | 109.97 (4)  | I5—Cd2—I1 <sup>i</sup>   | 107.33 (6)  |
| I4—Cd2—I1 <sup>i</sup>   | 95.62 (3)   | I4—Cd2—I1 <sup>i</sup>   | 96.24 (5)   |
| Cd1—I1—Cd2 <sup>ii</sup> | 96.79 (3)   | Cd1—I1—Cd2 <sup>ii</sup> | 99.48 (4)   |
| Cd2—I4—Cd1               | 100.00 (3)  | Cd2—I4—Cd1               | 101.69 (5)  |
| C5—N1—C2                 | 107.3 (10)  | C2A—N1—C5A               | 108 (6)     |
| N1—C2—C3                 | 102.4 (11)  | C5B—N1—C2B               | 92 (5)      |
| C2—C3—C4                 | 103.5 (12)  | N1—C2A—C3A               | 114 (8)     |
| C5—C4—C3                 | 103.2 (12)  | C2A—C3A—C4A              | 102 (6)     |
| C4—C5—N1                 | 106.5 (11)  | C3A—C4A—C5A              | 97 (7)      |
| C7—N6—C10                | 106.4 (10)  | N1—C5A—C4A               | 102 (7)     |
| C8—C7—N6                 | 103.8 (10)  | C3B—C2B—N1               | 101 (5)     |
| C9—C8—C7                 | 103.5 (10)  | C4B—C3B—C2B              | 100 (7)     |
| C10—C9—C8                | 101.6 (10)  | C5B—C4B—C3B              | 108 (8)     |

|           |            |              |         |
|-----------|------------|--------------|---------|
| C9—C10—N6 | 104.9 (10) | C4B—C5B—N1   | 118 (7) |
|           |            | C10A—N6—C7A  | 115 (3) |
|           |            | C7B—N6—C10B  | 121 (3) |
|           |            | N6—C7A—C8A   | 102 (4) |
|           |            | C9A—C8A—C7A  | 96 (4)  |
|           |            | C10A—C9A—C8A | 112 (4) |
|           |            | N6—C10A—C9A  | 101 (4) |
|           |            | N6—C7B—C8B   | 106 (4) |
|           |            | C7B—C8B—C9B  | 111 (4) |
|           |            | C8B—C9B—C10B | 108 (4) |
|           |            | N6—C10B—C9B  | 92 (3)  |

---

Dihedral angles

|              |            |                  |          |
|--------------|------------|------------------|----------|
| C5—N1—C2—C3  | -23.2 (13) | C5A—N1—C2A—C3A   | -41 (9)  |
| N1—C2—C3—C4  | 38.8 (13)  | N1—C2A—C3A—C4A   | 45 (10)  |
| C2—C3—C4—C5  | -40.2 (15) | C2A—C3A—C4A—C5A  | -25 (9)  |
| C3—C4—C5—N1  | 25.4 (15)  | C2A—N1—C5A—C4A   | 18 (9)   |
| C2—N1—C5—C4  | -1.4 (14)  | C3A—C4A—C5A—N1   | 7 (9)    |
| C10—N6—C7—C8 | 9.4 (13)   | C10A—N6—C7A—C8A  | 6 (5)    |
| N6—C7—C8—C9  | -33.2 (13) | N6—C7A—C8A—C9A   | -23 (4)  |
| C7—C8—C9—C10 | 44.8 (12)  | C7A—C8A—C9A—C10A | 36 (5)   |
| C8—C9—C10—N6 | -38.6 (12) | C7A—N6—C10A—C9A  | 15 (5)   |
| C7—N6—C10—C9 | 18.2 (13)  | C8A—C9A—C10A—N6  | -34 (6)  |
|              |            | C5B—N1—C2B—C3B   | -40 (7)  |
|              |            | N1—C2B—C3B—C4B   | 42 (8)   |
|              |            | C2B—C3B—C4B—C5B  | -27 (12) |
|              |            | C3B—C4B—C5B—N1   | -1 (14)  |
|              |            | C2B—N1—C5B—C4B   | 27 (11)  |
|              |            | C10B—N6—C7B—C8B  | 7 (6)    |
|              |            | N6—C7B—C8B—C9B   | 5 (6)    |
|              |            | C7B—C8B—C9B—C10B | -14 (6)  |
|              |            | C7B—N6—C10B—C9B  | -14 (5)  |
|              |            | C8B—C9B—C10B—N6  | 15 (5)   |

---

Symmetry code(s): (i)  $x-1/2, y-1/2, z$ ; (ii)  $x+1/2, y+1/2, z$ .

**Table S3.** Hydrogen-bond parameters.

| $D-H\cdots A$                       | $D-H$ (Å) | $H\cdots A$ (Å) | $D\cdots A$ (Å) | $D-H\cdots A$ (°) |
|-------------------------------------|-----------|-----------------|-----------------|-------------------|
| 100 K                               |           |                 |                 |                   |
| N1—H1A $\cdots$ I6                  | 0.97      | 2.72            | 3.587 (10)      | 148.7             |
| N1—H1B $\cdots$ I2 <sup>i</sup>     | 0.97      | 3.23            | 3.724 (11)      | 113.1             |
| N1—H1B $\cdots$ I3 <sup>ii</sup>    | 0.97      | 2.72            | 3.535 (10)      | 142.1             |
| C2—H2A $\cdots$ I5                  | 0.97      | 3.11            | 4.075 (13)      | 173.5             |
| C3—H3B $\cdots$ I3 <sup>iii</sup>   | 0.97      | 3.23            | 4.033 (15)      | 141.7             |
| C5—H5B $\cdots$ I3 <sup>ii</sup>    | 0.97      | 3.27            | 3.840 (13)      | 119.1             |
| N6—H6A $\cdots$ I3                  | 0.97      | 2.75            | 3.575 (11)      | 143.6             |
| N6—H6A $\cdots$ I5 <sup>iv</sup>    | 0.97      | 3.08            | 3.571 (10)      | 112.7             |
| N6—H6B $\cdots$ I1 <sup>v</sup>     | 0.97      | 3.27            | 3.802 (10)      | 116.1             |
| N6—H6B $\cdots$ I2 <sup>v</sup>     | 0.97      | 2.72            | 3.564 (11)      | 145.1             |
| C8—H8A $\cdots$ I2                  | 0.97      | 3.18            | 3.923 (14)      | 134.3             |
| C8—H8B $\cdots$ I5 <sup>v</sup>     | 0.97      | 3.29            | 3.915 (14)      | 124.2             |
| C9—H9A $\cdots$ I6                  | 0.97      | 3.25            | 3.987 (12)      | 134.3             |
| C9—H9B $\cdots$ I4 <sup>vi</sup>    | 0.97      | 3.31            | 3.892 (13)      | 120.4             |
| C9—H9B $\cdots$ I5 <sup>v</sup>     | 0.97      | 3.22            | 3.949 (12)      | 133.5             |
| C10—H10A $\cdots$ I1 <sup>vi</sup>  | 0.97      | 3.22            | 3.914 (12)      | 130.1             |
| 300 K                               |           |                 |                 |                   |
| N1—H1A $\cdots$ I3 <sup>ii</sup>    | 0.97      | 2.83            | 3.74 (3)        | 157.8             |
| N1—H1B $\cdots$ I6                  | 0.97      | 3.30            | 4.08 (4)        | 139.0             |
| C2A—H2AA $\cdots$ I5                | 0.97      | 3.07            | 3.89 (7)        | 143.3             |
| C2A—H2AB $\cdots$ I6 <sup>iii</sup> | 0.97      | 3.05            | 3.97 (10)       | 157.5             |
| C3A—H3AB $\cdots$ I3 <sup>iii</sup> | 0.97      | 3.23            | 3.94 (8)        | 131.3             |
| C3A—H3AB $\cdots$ I4 <sup>iii</sup> | 0.97      | 3.28            | 4.06 (9)        | 138.3             |
| C2B—H2BB $\cdots$ I5                | 0.97      | 2.79            | 3.71 (7)        | 159.1             |
| N6—H6A $\cdots$ I2 <sup>v</sup>     | 0.97      | 2.77            | 3.61 (2)        | 145.7             |
| N6—H6B $\cdots$ I3                  | 0.97      | 2.82            | 3.63 (2)        | 141.9             |
| C8A—H8AA $\cdots$ I2                | 0.97      | 3.08            | 3.95 (5)        | 149.2             |
| C8A—H8AB $\cdots$ I5 <sup>v</sup>   | 0.97      | 3.16            | 3.95 (5)        | 139.4             |
| C9A—H9AB $\cdots$ I4 <sup>vi</sup>  | 0.97      | 3.33            | 3.85 (5)        | 115.8             |
| C10A—H10A $\cdots$ I3               | 0.97      | 3.22            | 3.88 (6)        | 126.0             |
| C10A—H10B $\cdots$ I1 <sup>vi</sup> | 0.97      | 3.33            | 3.94 (6)        | 122.6             |
| C8B—H8BB $\cdots$ I2                | 0.97      | 3.16            | 3.99 (5)        | 145.1             |

Symmetry code(s): (i)  $x-1/2, y-1/2, z$ ; (ii)  $x-1, y, z$ ; (iii)  $x-1/2, y+1/2, z$ ; (iv)  $x+1/2, -y+1/2, z-1/2$ ; (v)  $x, -y+1, z-1/2$ ; (vi)  $x-1/2, -y+1/2, z-1/2$ .

a)

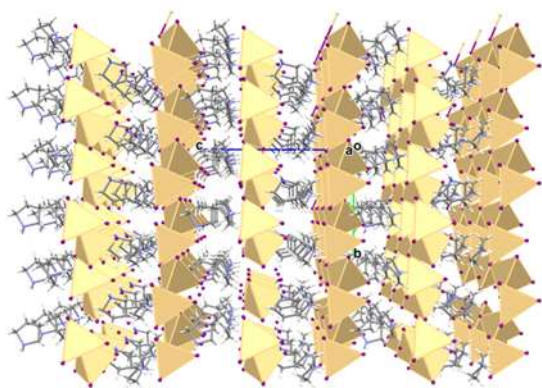

b)

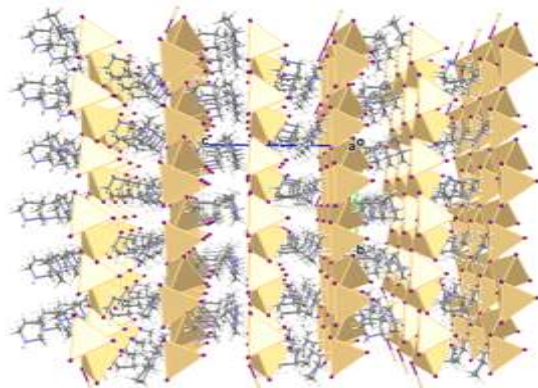

**Fig. S4.** Packing diagram of (PCdl), (a) at 100 K and (b) at 300 K projected at (011) plane



## Spontaneous polarization – theoretical calculations.

The Berry phase calculations<sup>1,2</sup> of HT phase were performed using the ordered models of the phase. For this purpose four structures have to be considered, with pyrrolidinium cations set manually to order the phase. Atomic coordinates of the model ordered phases are available in PCdl\_300\_AA.cif, PCdl\_300\_AB.cif, PCdl\_300\_BA.cif and PCdl\_300\_BB.cif files appended to Supplementary Materials.

Both LDA (Local Density Approximation, Teter Pade parametrization, keyword *ixc*)<sup>3</sup> and PBE (Perdew, Burke and Ernzerhof) density functionals,<sup>4</sup> as implemented in Abinit,<sup>5,6</sup> were used against plane wave basis sets defined by the energy cut-off of 400 eV.

The pseudopotentials used for these calculations were downloaded from <https://www.abinit.org>. In case of LDA calculations we used single projector, ordinary norm conserving pseudopotentials based on the Troullier-Martins method<sup>7</sup>, generated by D.C. Allan and A. Khein. For PBE calculations the pseudopotentials generated using FHI code were applied.

A dense Monkhorst–Pack k-point grid, ie. 3x3x2 ( $\sim 0.03 \text{ \AA}^{-1}$ ) mesh in each direction in the Brillouin zone) was used for electronic structure calculations of both considered phases.<sup>8</sup>

**Table S4.** Spontaneous polarization [ $\mu\text{C}\cdot\text{cm}^{-2}$ ] for LT phase and ordered models of HT phase calculated within Berry phase approach using LDA functional. For the polar axes of the LT phase, a polarization indetermination quantum is a multiple of  $7.883 \mu\text{C}\cdot\text{cm}^{-2}$  along the *a* axis and  $11.608 \mu\text{C}\cdot\text{cm}^{-2}$  along the *c* axis. The respective values for HT phase are  $7.716 \mu\text{C}\cdot\text{cm}^{-2}$  and  $11.169 \mu\text{C}\cdot\text{cm}^{-2}$ .

| LDA                      | a             | b            | c            |
|--------------------------|---------------|--------------|--------------|
| <b>LT (II)</b>           | <b>-3.184</b> | <b>0.000</b> | <b>4.582</b> |
| HT-AA                    | -3.691        | 0.000        | 5.547        |
| HT-AB                    | -3.915        | 0.000        | 5.776        |
| HT-BA                    | -3.349        | 0.001        | 5.309        |
| HT-BB                    | -3.578        | 0.001        | 5.541        |
| <b>HT (I) – averaged</b> | <b>-3.633</b> | <b>0.000</b> | <b>5.543</b> |

**Table S5.** Spontaneous polarization [ $\mu\text{C}\cdot\text{cm}^{-2}$ ] for LT phase and ordered models of HT phase calculated within Berry phase approach using PBA functional

| PBE                | a             | b            | c            |
|--------------------|---------------|--------------|--------------|
| <b>LT</b>          | <b>-3.219</b> | <b>0.000</b> | <b>4.635</b> |
| HT-AA              | -3.694        | 0.000        | 5.586        |
| HT-AB              | -3.917        | 0.000        | 5.806        |
| HT-BA              | -3.353        | 0.001        | 5.375        |
| HT-BB              | -3.581        | 0.001        | 5.599        |
| <b>HT-averaged</b> | <b>-3.636</b> | <b>0.000</b> | <b>5.591</b> |

The numerical data from Tables S4 and S5, representing the components of the spontaneous polarization of phases LT and HT, show little dependence on the density functional selected for the electronic structure calculations.

Due to a polarization indetermination quantum, whose value is determined by crystal cell parameters, accompanying a spontaneous polarization calculated using the Berry phase approach, the obtained results have to be interpreted against the experimental results. In our case it seems plausible to assume that the basic values tabulated in S4 and S5 are of physical significance.

- (1) Vanderbilt, D.; King-Smith, R. D. Electric Polarization as a Bulk Quantity and Its Relation to Surface Charge. *Phys. Rev. B* **1993**, *48* (7), 4442–4455.
- (2) King-Smith, R. D.; Vanderbilt, D. Theory of Polarization of Crystalline Solids. *Phys. Rev. B* **1993**, *47* (3), 1651–1654.
- (3) Ceperley, D. M.; Alder, B. J. Ground State of the Electron Gas by a Stochastic Model. *Phys. Rev. Lett.* **1980**, *45* (7), 566–569.
- (4) Perdew, J.; Burke, K.; Ernzerhof, M. Generalized Gradient Approximation Made Simple. *Phys. Rev. Lett.* **1996**, *77* (18), 3865–3868.
- (5) Gonze, X.; Beuken, J. M.; Caracas, R.; Detraux, F.; Fuchs, M.; Rignanese, G. M.; Sindic, L.; Verstraete, M.; Zerah, G.; Jollet, F.; et al. First-Principles Computation of Material Properties: The ABINIT Software Project. *Comput. Mater. Sci.* **2002**, *25* (3), 478–492.
- (6) Gonze, X.; Jollet, F.; Abreu Araujo, F.; Adams, D.; Amadon, B.; Applencourt, T.; Audouze, C.; Beuken, J. M.; Bieder, J.; Bokhanchuk, A.; et al. Recent Developments in the ABINIT Software Package. *Comput. Phys. Commun.* **2016**, *205*, 106–131.
- (7) Troullier, N.; Martins, J. L. Efficient Pseudopotentials for Plane-Wave Calculations. II. Operators for Fast Iterative Diagonalization. *Phys. Rev. B* **1991**, *43* (11), 8861–8869.
- (8) Monkhorst, H. J.; Pack, J. D. Special Points for Brillouin-Zone Integrations. *Phys. Rev. B* **1976**, *13* (12), 5188–5192.

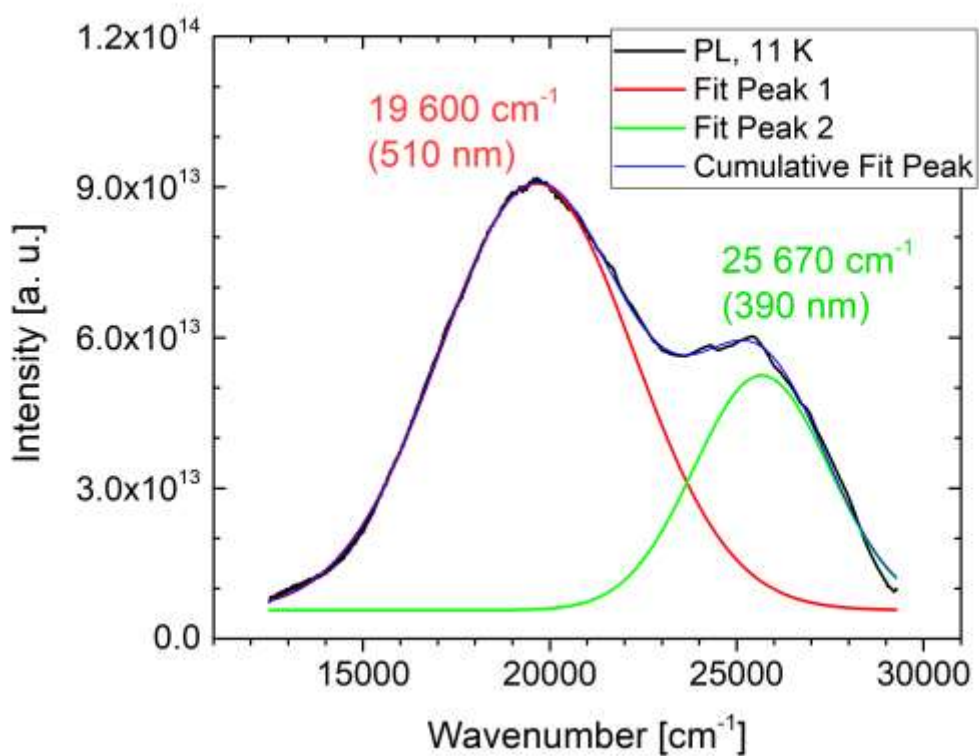

Fig. S5. Gaussian deconvolution of photoluminescence spectrum of PCdI measured at 11 K.

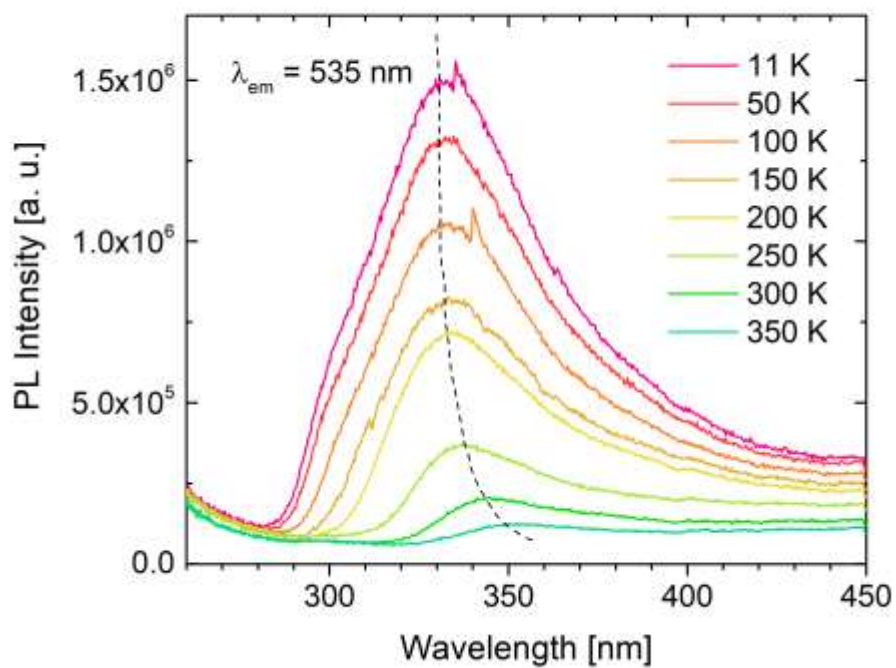

Fig. S6. Temperature dependence of excitation spectra monitored at 535 nm.

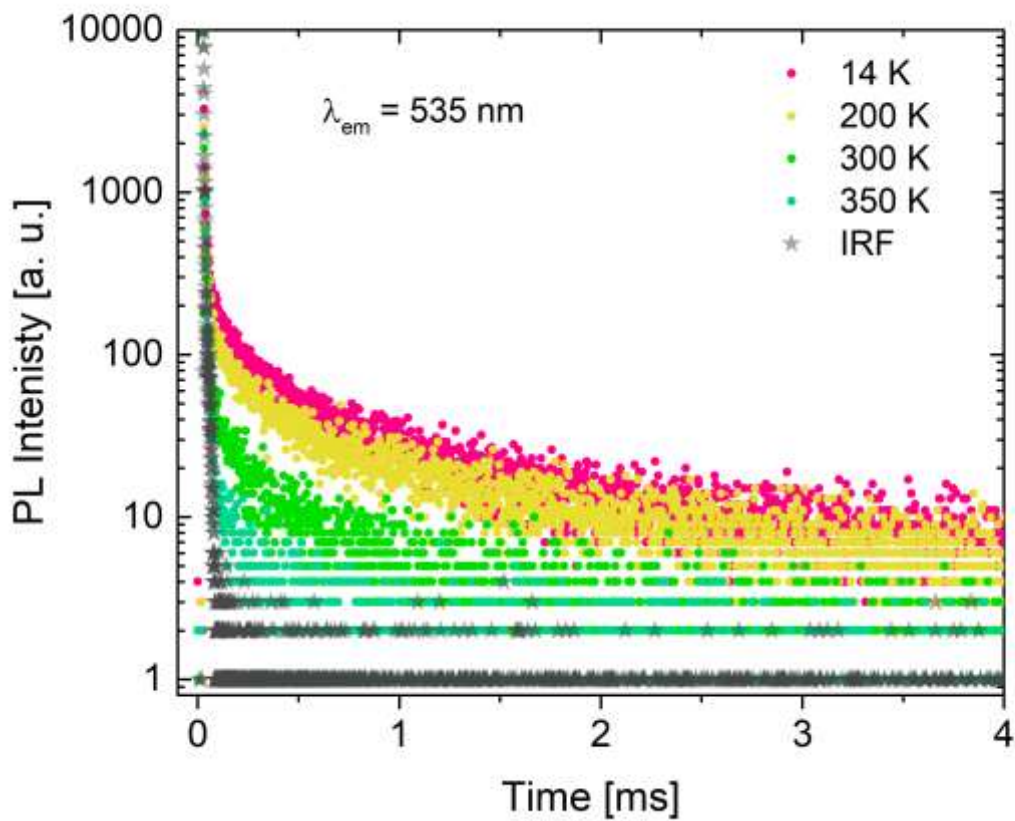

**Fig. S7.** Temperature dependence of 535 nm emission decay.

**Table S6.** Temperature dependence of average lifetime of 535 nm emission. The decay curves recorded during 335 nm excitation.

| Temperature [K] | $\tau_{av}$ [ $\mu\text{s}$ ] |
|-----------------|-------------------------------|
| 11              | 490                           |
| 50              | 512                           |
| 100             | 555                           |
| 150             | 522                           |
| 200             | 521                           |
| 250             | 276                           |
| 300             | 132                           |
| 350             | 12                            |

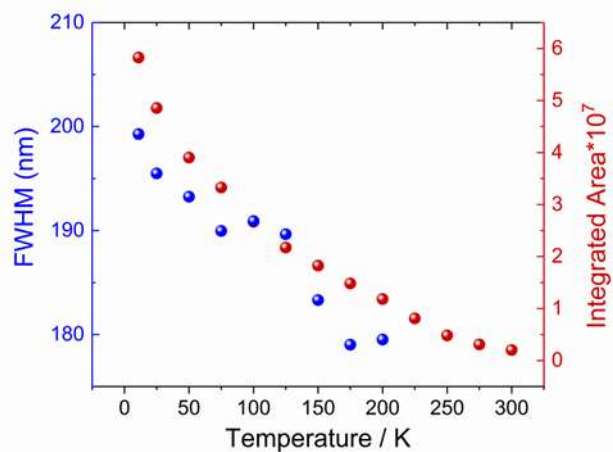

**Fig. S8.** Temperature dependence of the integrated emission intensity (brown spheres) and FWHM (blue spheres) of **PCdl**.

**Table S7.** Comparison of the CIE chromaticity coordinates (x, y) and CCT (K) for **PCdl**.

| ID | 1931 Measurements   | X Coord | Y Coord | I (lum)    | CCT [K] |
|----|---------------------|---------|---------|------------|---------|
| 1  | Em 25.0K (TempMap)  | 0.30117 | 0.37488 | 3.340E+004 | 6733    |
| 2  | Em 50.0K (TempMap)  | 0.29657 | 0.37205 | 2.653E+004 | 6955    |
| 3  | Em 75.0K (TempMap)  | 0.29513 | 0.37200 | 2.262E+004 | 7020    |
| 4  | Em 100.0K (TempMap) | 0.29517 | 0.37217 | 1.854E+004 | 7017    |
| 5  | Em 125.0K (TempMap) | 0.29742 | 0.37518 | 1.568E+004 | 6893    |
| 6  | Em 150.0K (TempMap) | 0.29910 | 0.38024 | 1.354E+004 | 6783    |
| 7  | Em 175.0K (TempMap) | 0.30207 | 0.38574 | 1.128E+004 | 6626    |
| 8  | Em 200.0K (TempMap) | 0.30163 | 0.38472 | 8.945E+003 | 6650    |
| 9  | Em 225.0K (TempMap) | 0.30183 | 0.38049 | 5.986E+003 | 6668    |
| 10 | Em 250.0K (TempMap) | 0.30507 | 0.37685 | 3.511E+003 | 6557    |
| 11 | Em 275.0K (TempMap) | 0.30790 | 0.38042 | 2.294E+003 | 6423    |
| 12 | Em 300.0K (TempMap) | 0.30577 | 0.37397 | 1.474E+003 | 6545    |

## <sup>1</sup>H-NMR.

Temperature dependence of the second moment ( $M_2$ ) of the <sup>1</sup>H NMR line for **PCdl** is shown in Figure S9. It should be noticed that even at the lowest temperatures (113 K) any plateau of  $M_2$  has been not reached. Two reductions of the  $M_2$  value are visible. First reduction of  $\Delta M_2(1)$ , is only partially visible above 113 K and the next one,  $\Delta M_2(2)$ , occurs around 230 K. Between 230 and 290 K  $M_2$  value stabilizes at about 8.4 G<sup>2</sup>. It means that the full isotropic motion of the pyrrolidinium cation is not expected even at RT. A similar behaviour of the  $M_2$  and comparable values ( $M_2$ ) were found in another pyrrolidinium analogues [1, 2].

The basic equation for the dipolar second moment,  $M_2$ , of a NMR line was derived by van Vleck [3]:

$$M_2 = \frac{3}{5} I(I+1) \gamma^2 \hbar^2 \frac{1}{N} \sum_{i=1}^N \sum_{j=1}^N R_{ij}^6 \quad (1)$$

where  $N$  is the number of protons in the unit cell. The rigid value of  $M_2$  calculated from the crystal structure of **PCdl** appeared to be about 19,9 G<sup>2</sup> with assumed lengths of bonds: C-H 1.09 Å and N-H 1.03 Å. The obtained from the theoretical calculation  $M_2$  value is much smaller than the measured one. Such a discrepancy is probably the result of uncertainty in adopting the correct N-H bond lengths. Analysis of the temperature dependence of  $M_2$  can be performed on the basis of the BPP formula:

$$M_2 = \Delta M_2(1) \frac{2}{\pi} \tan^{-1}(\gamma_H \tau_c \sqrt{M_2}) + \Delta M_2(2) \frac{2}{\pi} \tan^{-1}(\gamma_H \tau_c \sqrt{M_2}) + M_2^{\text{Motion}} \quad (2)$$

where  $\tau_c = \tau_0 \exp(E_a/RT)$ ,  $M_2^{\text{Rigid}}$  (where  $M_2^{\text{Rigid}} = \Delta M_2(1) + \Delta M_2(2) + M_2^{\text{Motion}}$ ) and  $M_2^{\text{Motion}}$  are the second-moment values before and after of both second moment reduction, respectively

Based on the equation (1) and (2) the following results we obtained : for the first reduction of  $M_2$  the activation energy ( $E_{a1}$ ) = 12.1 kJ/mol and the correlation time ( $\tau_1$ ) = 5.88 10<sup>-11</sup> s, whereas for the second reduction of  $M_2$  the  $E_{a2}$  = 14.9 kJ/mol and  $\tau_2$  = 2.09 10<sup>-9</sup> s.

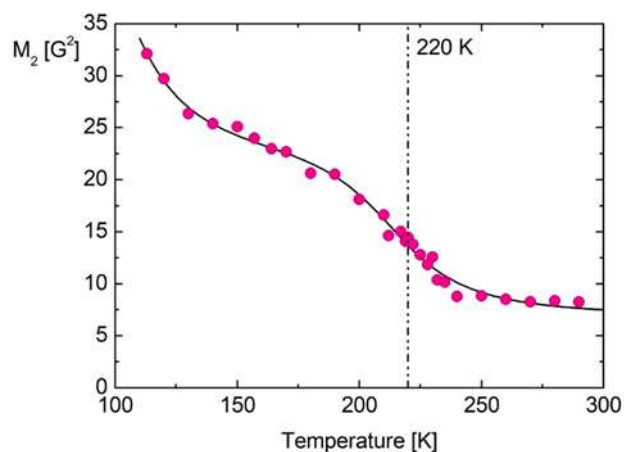

**Fig. S9.** Temperature dependence of the second moment,  $M_2$ , of the proton NMR lines for **PCdl**.

**Table S8.** Activation energies, correlation times and motional constants evaluated for **PCdl**.

| Temperature Range [K] | Component | $E_a$ [kJ/mol] | $\tau_0$ [s]         | $C$ [s <sup>-2</sup> ] |
|-----------------------|-----------|----------------|----------------------|------------------------|
| 90 - 170              | 1         | 6.1            | $2.5 \cdot 10^{-11}$ | $2.6 \cdot 10^7$       |
| 170 - 226             | 2         | 32.2           | -                    | -                      |
| 226 - 230             | 3         | 34.3           | -                    | -                      |
| 230 - 239             | 4         | 16             | -                    | -                      |
| 259 - 296             | 5         | 17.5           | -                    | -                      |

[1] M. Wojciechowska, A. Gagor, A. Piecha-Bisiorek, R. Jakubas, A. Cizman, J. K. Zaręba, M. Nyk, P. Zieliński, W. Medycki and A. Bil, *Chem. Mater.*, 2018, **30**, 4597–4608.

[2] M. Ksiadzyna, A. Gagor, A. Piecha-Bisiorek, A. Cizman, W. Medycki and R. Jakubas, *J. Mater. Chem. C*, 2019, **7**, 10360–10370.

[3] Van Vleck, J. H. Dipolar Broadening. *Phys. Rev.* **1948**, *74*, 1168–1183.
